# Supplementary material for: In Vitro and In Vivo Antihyperglycemic Effects of New Metabiotics from Boletus edulis
Source: MDPI journal article supplement (doi:10.3390/life14010068), 2023-12-30
Supplement: s1 [file s1]

**Table S1.** The value of major genous after *in vitro* simulations

| Samples                        | Prokaryote             | Enterobacteriaceae     | Firmicutes              | Lactobacillus           | Actinomyces            | Bacteroides            |
|--------------------------------|------------------------|------------------------|-------------------------|-------------------------|------------------------|------------------------|
| Control - untreated microbiota | 8.10±0.01              | 4.97±0.12 <sup>b</sup> | 7.82±0.05               | 7.39±0.04               | 3.74±0.04              | 3.00±0.42              |
| Control - arabic gum           | 8.10±0.05              | 2.74±0.25 <sup>b</sup> | 7.48±0.05 <sup>b</sup>  | 7.74±0.07 <sup>b</sup>  | 2.15±0.31 <sup>a</sup> | 1.86±0.04 <sup>a</sup> |
| P1 - ColonX                    | 8.10±0.23              | 4.96±0.49              | 7.61±0.006 <sup>a</sup> | 7.98±0.006 <sup>c</sup> | 2.53±0.05 <sup>b</sup> | 3.14±0.04              |
| P2 - CARDIO                    | 8.10±0.04 <sup>a</sup> | 3.32±0.08 <sup>b</sup> | 7.41±0.004 <sup>b</sup> | 7.46±0.01               | 1.51±0.04 <sup>c</sup> | 2.40±0.04              |
| P3 - GLYCEMIC                  | 8.03±0.06              | 4.90±0.07              | 7.49±0.08 <sup>a</sup>  | 7.80±0.03 <sup>c</sup>  | 2.99±0.06 <sup>c</sup> | 3.76±0.02              |
